# Supplementary material for: Currently used organophosphate flame retardants determined in the settled dust of masjids and hotels of Saudi Arabia, a new insight into human health implications of dust exposure
Source: Royal Society of Chemistry journal article supplement (doi:10.1039/c8em00014j), 2018-01-01
Supplement: c8em00014j1.pdf [file c8em00014j1.pdf]

1 **Supplementary Information**

2 **Current used Organophosphate Flame Retardants in settled dust of Masjids and**  
3 **Hotels of Saudi Arabia, a new insight of human health implication via dust exposure**

4 Nadeem Ali<sup>1</sup>, Iqbal Mohammad Ibrahim Ismail<sup>1,2</sup>, Mohammad W Kadi<sup>2</sup>, Hussain Mohammed Salem Ali  
5 Albar<sup>3</sup>

6 <sup>1</sup>Center of Excellence in Environmental Sciences, King Abdulaziz University, Jeddah, Saudi Arabia

7 <sup>2</sup>Department of Chemistry, Faculty of Sciences, King Abdulaziz University, Jeddah, Saudi Arabia

8 <sup>3</sup>Department of Family and Community Medicine, Medical College, King Abdulaziz University, Jeddah,  
9 Saudi Arabia

10

11 \*Corresponding author

12 **Dr Nadeem Ali**

13 Center of Excellence in Environmental Studies, King Abdulaziz University

14 P.O Box: 80216 Jeddah 21589, Saudi Arabia

15 Fax : +966(12)6951674

16 Phone: +966(12)6402000 Ext: 20777

17 [nbahadar@kau.edu.sa](mailto:nbahadar@kau.edu.sa)

18 [Chakrian2010@gmail.com](mailto:Chakrian2010@gmail.com)

19

20

21 **Consist of three tables and 1 figure.**

22 **Table S1**, Details of the dust samples collected from mosques.

| Sample ID | Date       | Area (district) | Age | Carpeted<br>(old or<br>new) | Number of<br>main<br>entrance<br>door | Capacity<br><200 | Capacity<br>>200 | AC type<br>(window/<br>split) | No. of ACs | Bakhoor |
|-----------|------------|-----------------|-----|-----------------------------|---------------------------------------|------------------|------------------|-------------------------------|------------|---------|
| M-01      | 7/02/2017  | Alsulimaniah    | 13  | Old                         | 1                                     | X                |                  | Window                        | 4          |         |
| M-02      | 7/2/2017   | Alsulimaniah    | 20  | Old                         | 2                                     |                  | x                | Split                         | 10         | x       |
| M-03      | 7/2/2017   | Al -faheya      | 16  | Old                         | 2                                     |                  | x                | Split                         | 15         | X       |
| M-04      | 9/2/2017   | Al -raya        | 5   | New                         | 3                                     |                  | x                | Split                         | 12         | X       |
| M-05      | 11/2/2017  | Alsulimaniah    | 4   | New                         | 1                                     | X                |                  | Centralized                   |            | X       |
| M-06      | 11/2/2017  | Quizah          | 21  | Old                         | 3                                     |                  | x                | Split                         | 14         | X       |
| M-07      | 12/2/2017  | Quizah          | 5   | New                         | 5                                     |                  | x                | Centralized                   |            | X       |
| M-08      | 11/2/2017  | Al -raya        | 12  | Old                         | 1                                     | x                |                  | Window                        | 4          |         |
| M-09      | 13/02/2017 | Al -nasim       | 13  | Old                         | 3                                     |                  | x                | Centralized                   |            | X       |
| M-10      | 14/02/2017 | Al -mosaid      | 14  | Old                         | 1                                     | x                |                  | Window                        | 6          |         |
| M-11      | 14/02/2017 | Alsulimaniah    | 12  | Old                         | 1                                     | x                |                  | Window                        | 4          |         |
| M-12      | 14/02/2017 | Al -faheya      | 5   | New                         | 2                                     | x                |                  | Centralized                   |            |         |
| M-13      | 14/02/2017 | Al jamah        | 12  | Old                         | 1                                     | x                |                  | Split                         | 5          |         |
| M-14      | 15/02/2017 | KAU             | 8   | New                         | 2                                     | x                |                  | Split                         | 6          |         |
| M-15      | 20/2/2017  | Al safa         | 28  | Old                         | 3                                     | x                |                  | Split                         | 14         | x       |
| M-16      | 20/02/2017 | Al aziziah      | 14  | Old                         | 1                                     |                  | x                | Split                         | 11         | x       |
| M-17      | 20/02/2017 | Al -faisliah    | 12  | Old                         | 2                                     |                  | x                | Split                         | 12         | x       |
| M-18      | 20/02/2017 | Al-nasim        | 15  | Old                         | 2                                     |                  | x                | Split                         | 12         | x       |
| M-19      | 5/3/2017   | Al -mosaid      | 22  | Old                         | 2                                     |                  | x                | Split                         | 13         | x       |
| M-20      | 5/3/2017   | Al -jamiah      | 26  | Old                         | 3                                     |                  | x                | Split                         | 15         | x       |
| M-21      | 11/5/2017  | Al -maroah      | 23  | Old                         | 3                                     |                  | x                | Split                         | 8          | x       |
| M-22      | 11/5/2017  | Quizah          | 12  | Old                         | 2                                     |                  | x                | Centralized                   |            | x       |
| M-23      | 14/05/2017 | Al -sulimaniah  | 18  | Old                         | 4                                     |                  | x                | Split                         | 10         | x       |
| M-24      | 14/05/2017 | Al -zahra       | 6   | New                         | 3                                     |                  | x                | Centralized                   |            | x       |
| M-25      | 14/05/2017 | Mishrefa        | 23  | Old                         | 3                                     |                  | x                | Split                         | 10         | x       |
| M-26      | 15/05/2017 | Al -faissliah   | 5   | New                         | 1                                     | x                |                  | Centralized                   |            | x       |
| M-27      | 15/05/2017 | Al -soarik      | 19  | Old                         | 4                                     |                  | x                | Split                         | 10         | x       |
| M-28      | 16/05/2017 | Al -ruabi       | 17  | Old                         | 2                                     |                  | x                | Split                         | 6          | x       |
| M-29      | 16/05/2017 | Al -komra       | 20  | Old                         | 3                                     |                  | x                | Split                         | 9          | x       |
| M-30      | 16/05/2017 | Al -ruabi       | 16  | Old                         | 1                                     | x                |                  | Window                        | 4          | x       |

24 **Table S2**, Results of two sample t-test to study the difference of PFRs between hotel and Masjid, new  
 25 and old Masjid, small and large Masjid, and centralized and split/window air conditioning Masjids.

| <b>Masjid characteristics</b> | <b>Statistics</b> | <b>TCEP</b> | <b>TCP</b> | <b>TDCPP</b>  | <b>TPhP</b> |
|-------------------------------|-------------------|-------------|------------|---------------|-------------|
| Split/Window (N=23)           | Mean              | 661         | 2540       | 3127          | 1986        |
|                               | STD               | 699         | 883        | 1486          | 1406        |
| Centralized (N=7)             | Mean              | 388         | 1979       | 2534          | 1800        |
|                               | STD               | 129         | 469        | 1223          | 1434        |
|                               | P                 | 0.318       | 0.102      | 0.346         | 0.762       |
| New (N=7)                     | Mean              | 829         | 2387       | 3120          | 1800        |
|                               | STD               | 1169        | 959        | 2045          | 1330        |
| Old (N=23)                    | Mean              | 528         | 2432       | 2904          | 1914        |
|                               | STD               | 350         | 830        | 1257          | 1423        |
|                               | P                 | 0.273       | 0.904      | 0.734         | 0.852       |
| Large (N=20)                  | Mean              | 505         | 2322       | 2550          | 1538        |
|                               | STD               | 383         | 886        | 1078          | 1172        |
| Small (N=10)                  | Mean              | 782         | 2611       | 3727          | 2548        |
|                               | STD               | 949         | 770        | 1780          | 1556        |
|                               | P                 | 0.261       | 0.387      | <b>0.0317</b> | 0.056       |

26

27

28

29

30

31 **Table S3** Comparison of PFR concentrations in SRM 2585 (ng/g) observed from different studies.

| PFRs  | This study<br>(n = 3) | Bergh et al.,<br>2012<br>(n=5) | Brandsma et<br>al., 2014<br>(n=3) | Van den Eede<br>et al., 2012<br>(n=5) | Fromme et al.,<br>2014 |
|-------|-----------------------|--------------------------------|-----------------------------------|---------------------------------------|------------------------|
| TCEP  | 1200                  | 840                            | 810                               | 700                                   | 700                    |
| TCPP  | 1100                  | 880                            | 750                               | 820                                   | 1000                   |
| TDCPP | 2600                  | 2300                           | 2500                              | 2020                                  | 2200                   |
| TPhP  | 1150                  | 1100                           | 890                               | 990                                   | 700                    |

32 Bergh C, Torgrip R, Emenius G, Ostman C. Organophosphate and phthalate esters in air and settled dust  
33 - a multi-location indoor study. *Indoor Air*. 2011; 21(1):67–76.

34 Brandsma SH, de Boer J, van Velzen MJ, Leonards PE. Organophosphorus flame retardants (PFRs) and  
35 plasticizers in house and car dust and the influence of electronic equipment. *Chemosphere*. 2014;  
36 116:3–9.

37 Fromme H, Lahrz T, Kraft M et al. Organophosphate flame retardants and plasticizers in the air and dust  
38 in German daycare centers and human biomonitoring in visiting children (LUPE 3). *Environ Int*.  
39 2014; 71:158–163.

40 Van den Eede, N., et al. Analytical developments and preliminary assessment of human exposure to  
41 organophosphate flame retardants from indoor dust. *Environ Int*. 2011; 37(2): 454–461.

42

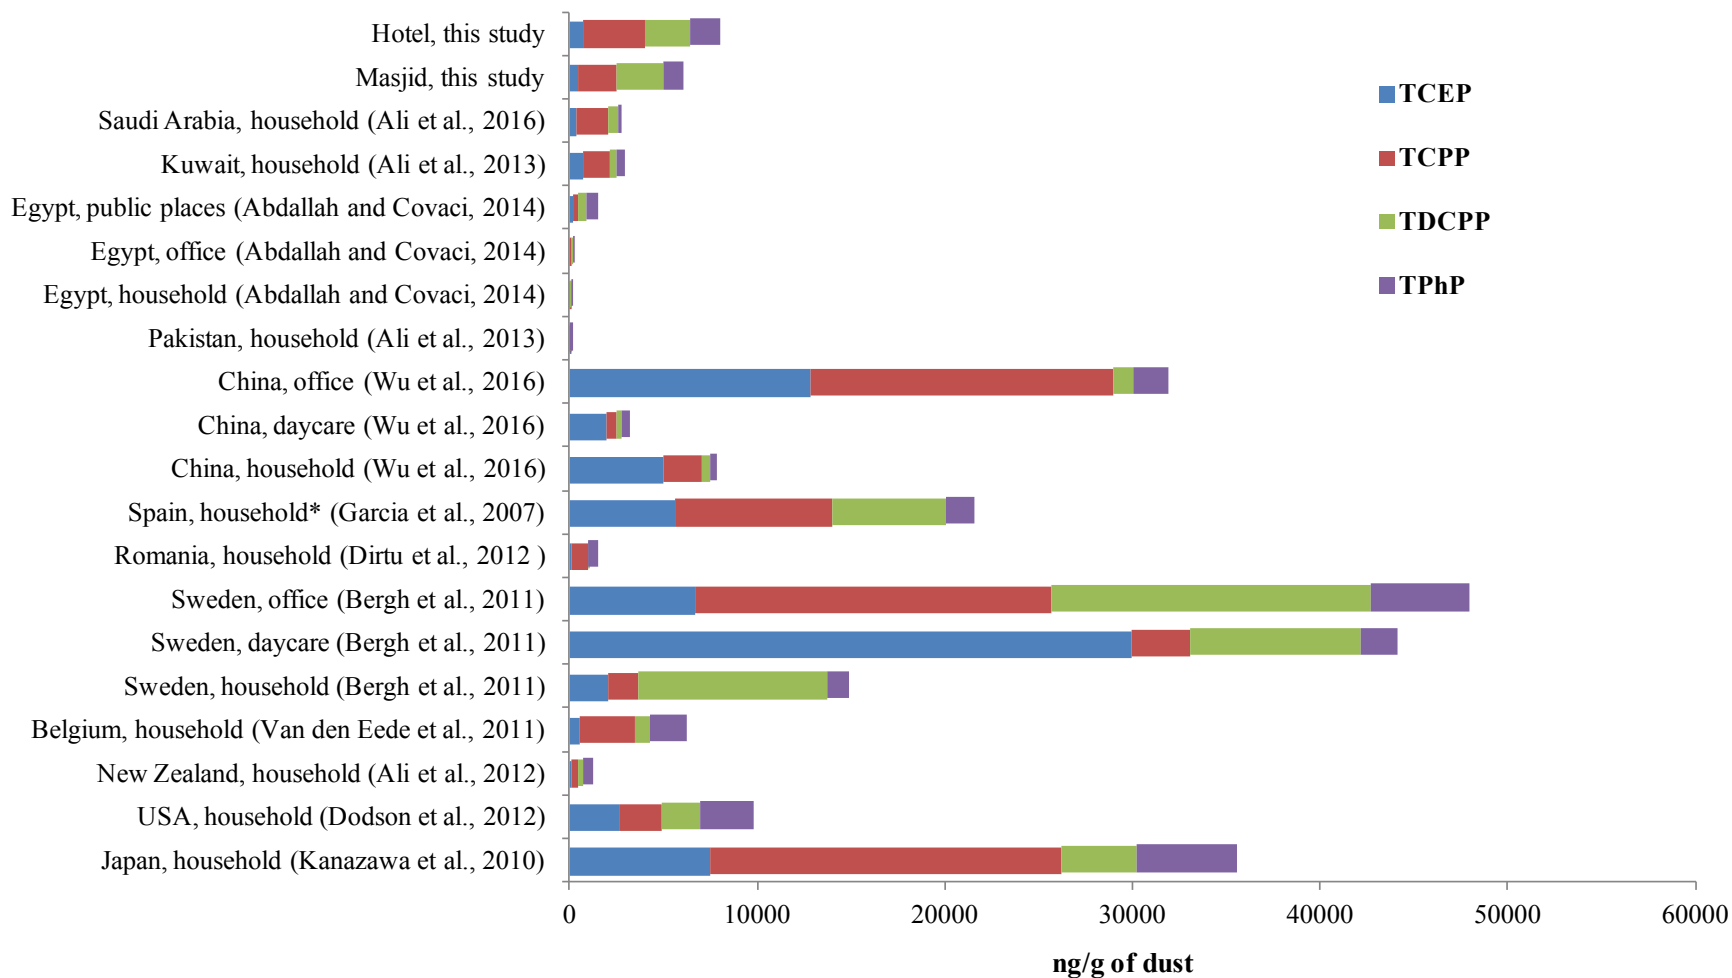

**Figure S1**, Levels and profile of selected PFRs in indoor dust of different countries and different indoor microenvironments. All selected values are median (ng/g) except for mean values from Garcia et al., 2007.
